# Supplementary material for: Predicting Daily PM2.5 Exposure with Spatially Invariant Accuracy Using Co-Existing Pollutant Concentrations as Predictors
Source: MDPI journal article supplement (doi:10.3390/atmos13050782), 2022-05-12
Supplement: s1 [file s1]

# Supplementary material: Predicting Daily PM<sub>2.5</sub> Exposure with Spatially Invariant Accuracy Using Co-existing Pollutant Concentrations as Predictors

Shin Araki<sup>a\*</sup>, Hikari Shimadera<sup>a</sup>, Hideki Hasunuma<sup>b</sup>, Yoshiko Yoda<sup>b</sup>, Masayuki Shima<sup>b</sup>

<sup>a</sup> Graduate School of Engineering, Osaka University, Suita 565-0871, Japan

<sup>b</sup> Department of Public Health, Hyogo College of Medicine, Nishinomiya 663-8501, Japan

\* Correspondence: araki@ea.see.eng.osaka-u.ac.jp

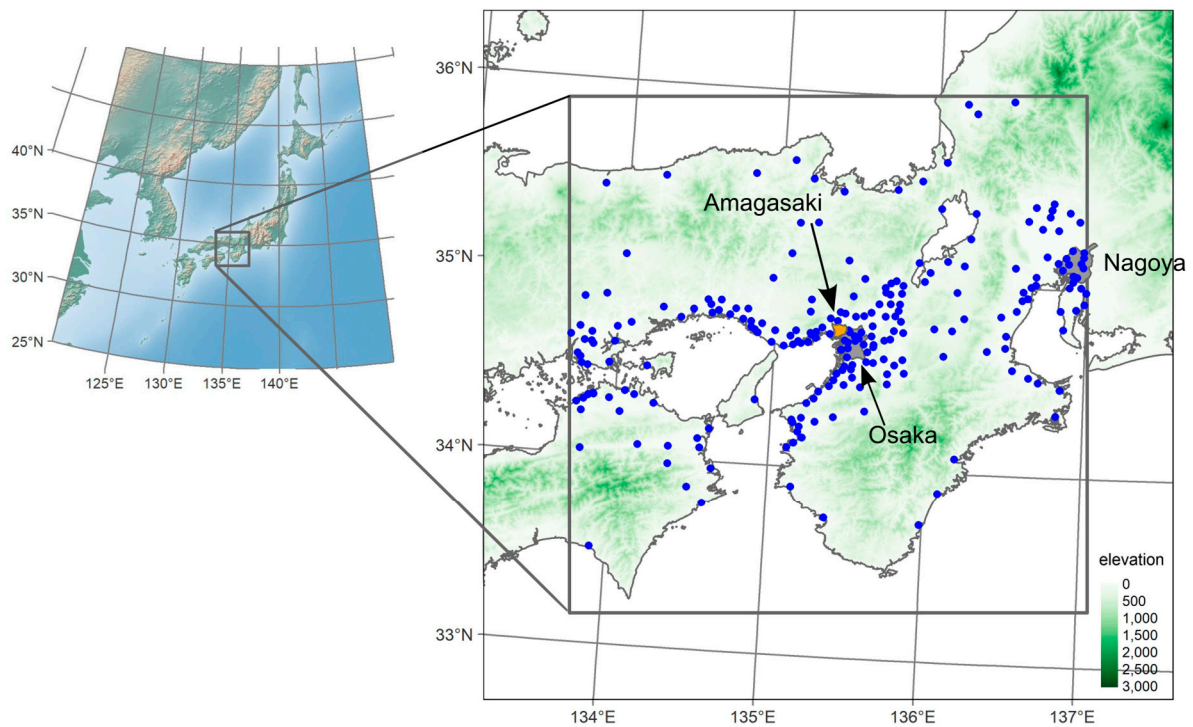

**Figure S1.** Study area. The blue dots represent the monitoring locations. The inner rectangle represents the modeling and prediction areas. The colored area indicates Amagasaki. The shaded areas indicate Osaka and Nagoya.

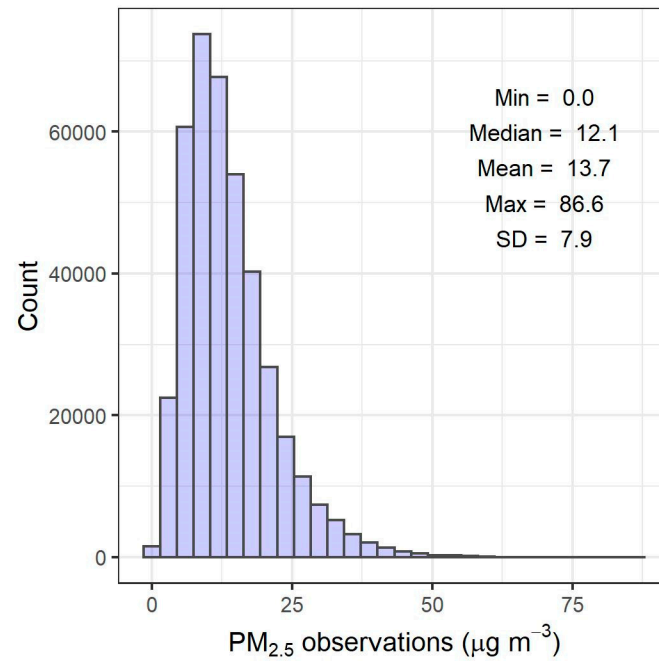

**Figure S2.** Histograms of the daily PM<sub>2.5</sub> observations used in this study. Unit is  $\mu\text{g m}^{-3}$ .

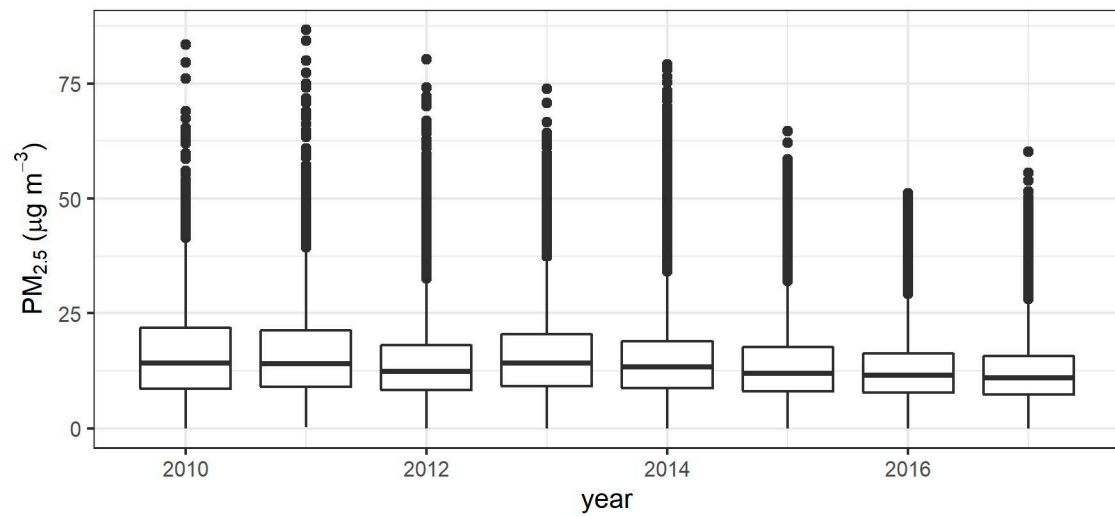

**Figure S3.** Boxplot of the daily PM<sub>2.5</sub> observations used in this study. Unit is  $\mu\text{g m}^{-3}$ .

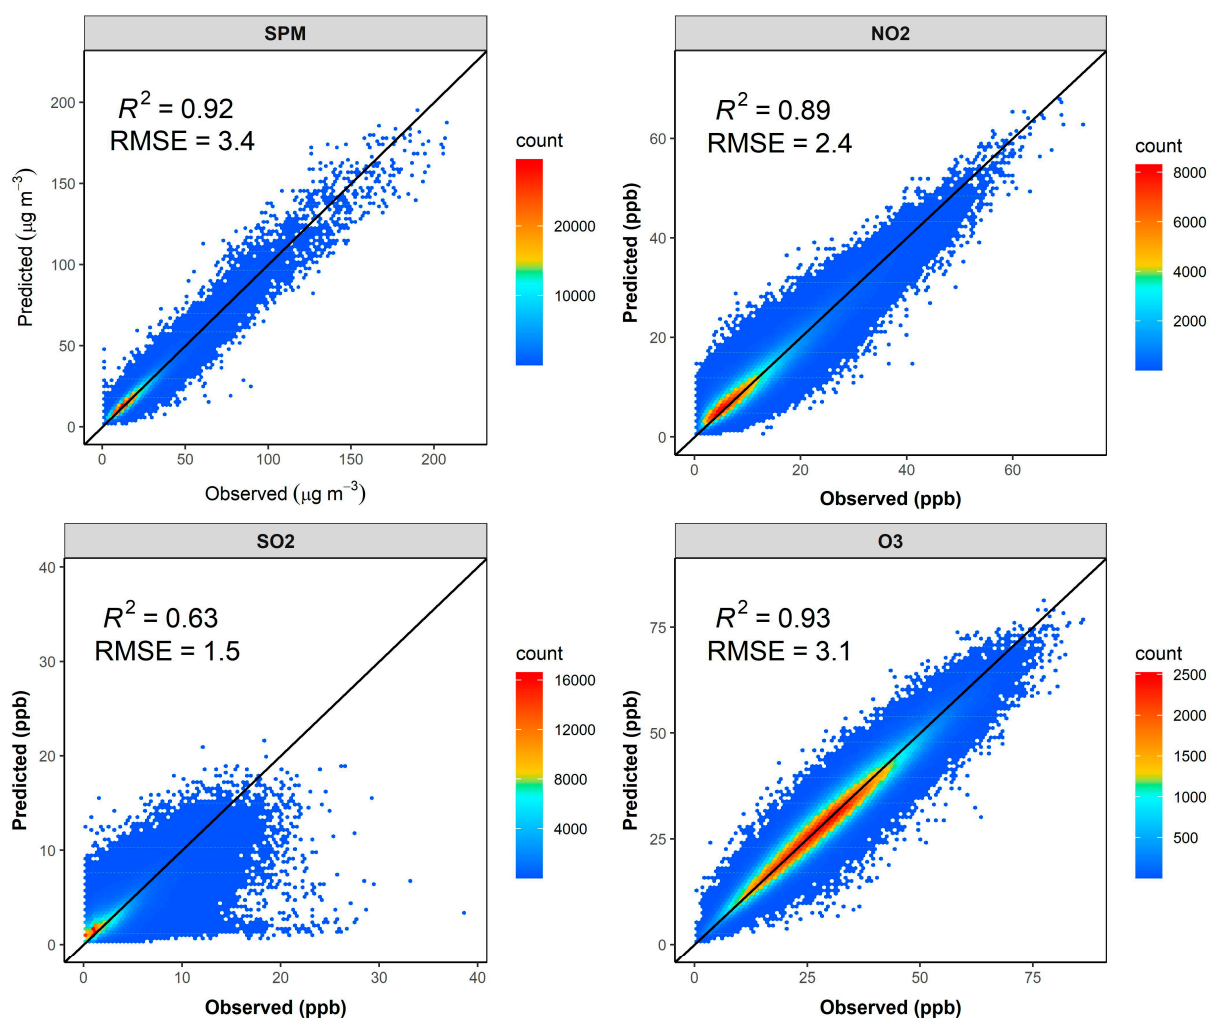

**Figure S4.** Validation results of ordinary kriging for co-existing pollutants obtained by 5-fold cross-validation via ordinary kriging to obtain model predictors. Red represents higher point density and blue represents lower density. The lines in each panel represent a 1:1 line.

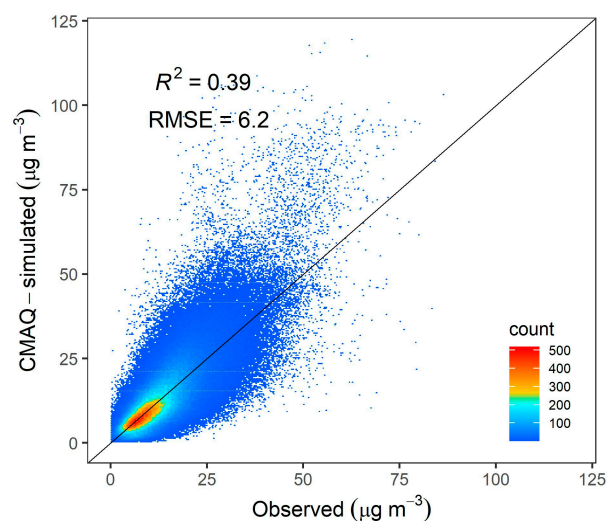

**Figure S5.** Scatter plots of the CMAQ-simulated and observed daily PM<sub>2.5</sub> concentrations in the study area from 2010 to 2017.

**Table S1.** Predictors used in this study.

| Variables                             | Temporal Resolution | Units                                 |
|---------------------------------------|---------------------|---------------------------------------|
| Kriged SPM                            | Daily               | $\mu\text{g m}^{-3}$                  |
| Kriged NO <sub>2</sub>                | Daily               | ppb                                   |
| Kriged O <sub>3</sub>                 | Daily               | ppb                                   |
| Kriged SO <sub>2</sub>                | Daily               | ppb                                   |
| CMAQ PM <sub>2.5</sub>                | Daily               | $\mu\text{g m}^{-3}$                  |
| WRF temperature                       | Daily               | K                                     |
| WRF precipitation                     | Daily               | mm h <sup>-1</sup>                    |
| WRF relative humidity                 | Daily               | %                                     |
| WRF wind speed                        | Daily               | m s <sup>-1</sup>                     |
| WRF PBL                               | Daily               | m                                     |
| Built-up area ration                  | Constant            | unitless                              |
| Green area ratio                      | Constant            | unitless                              |
| Agricultural area ratio               | Constant            | unitless                              |
| Large PM <sub>2.5</sub> point sources | Monthly             | kg km <sup>-2</sup> day <sup>-1</sup> |
| Primary road length                   | Constant            | km                                    |
| Highway road length                   | Constant            | km                                    |
| Distance to primary road              | Constant            | km                                    |
| Distance to highway                   | Constant            | km                                    |
| Elevation                             | Constant            | m                                     |
| Population                            | Constant            | number                                |

**Table S2.** Data sources.

| Predictor                                  | Data Source                              | Period    | Source                                                                                                                  |
|--------------------------------------------|------------------------------------------|-----------|-------------------------------------------------------------------------------------------------------------------------|
| <b>Air quality monitoring network data</b> | Ministry of Environment, Japan           | 2010–2017 | <a href="http://www.nies.go.jp/igreen/">http://www.nies.go.jp/igreen/</a>                                               |
| <b>Land use data</b>                       | National Land Numerical Information Data | 2014      | <a href="http://nlftp.mlit.go.jp/ksj/">http://nlftp.mlit.go.jp/ksj/</a>                                                 |
| <b>Elevation</b>                           |                                          |           |                                                                                                                         |
| <b>Emission from large point sources</b>   | EAGrid2010-Japan                         | 2010      | <a href="https://doi.org/10.11298/taiki.49.117">https://doi.org/10.11298/taiki.49.117</a>                               |
| <b>Road network data</b>                   | OpenStreetMap                            | 2015      | <a href="https://www.openstreetmap.org">https://www.openstreetmap.org</a>                                               |
| <b>Population</b>                          | National Census                          | 2010      | <a href="http://e-stat.go.jp/SG2/eStat-GIS/page/download.html">http://e-stat.go.jp/SG2/eStat-GIS/page/download.html</a> |

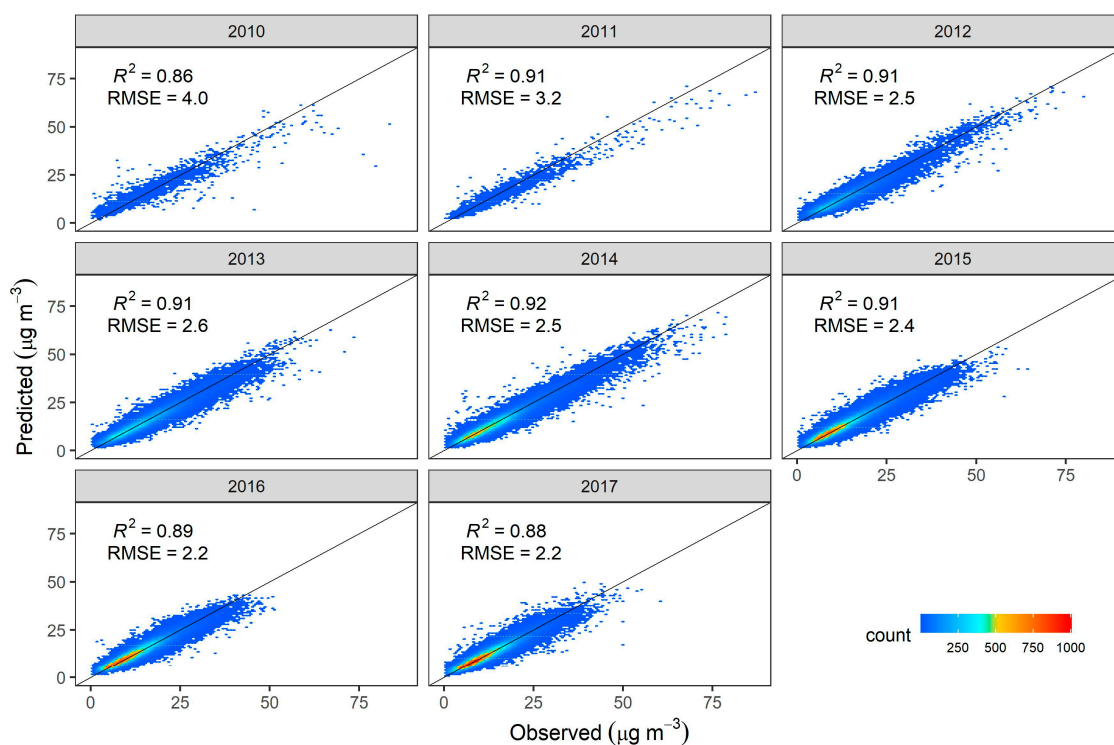

**Figure S6.** Scatter plots of the observed and predicted concentrations obtained by spatial cross-validation summarized by year. Red represents higher point density and blue represents lower density. The lines in each panel represent a 1:1 line.

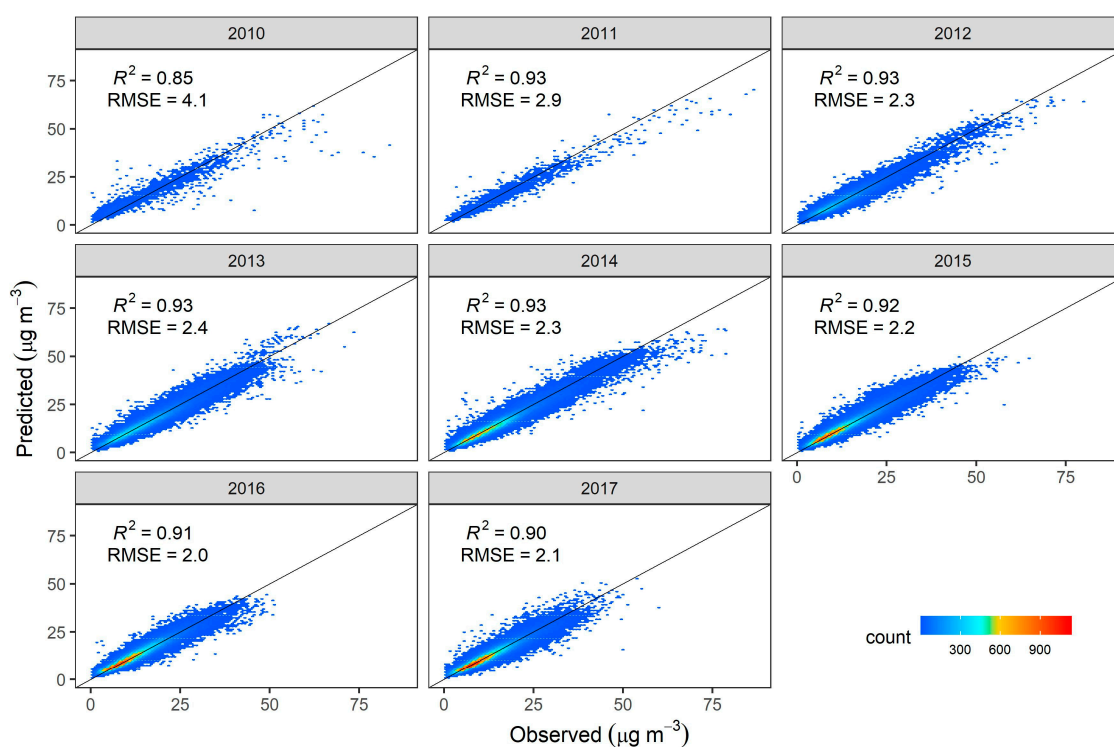

**Figure S7.** Scatter plots of the observed and predicted concentrations obtained by temporal cross-validation summarized by year. Red represents higher point density and blue represents lower density. The lines in each panel represent a 1:1 line.

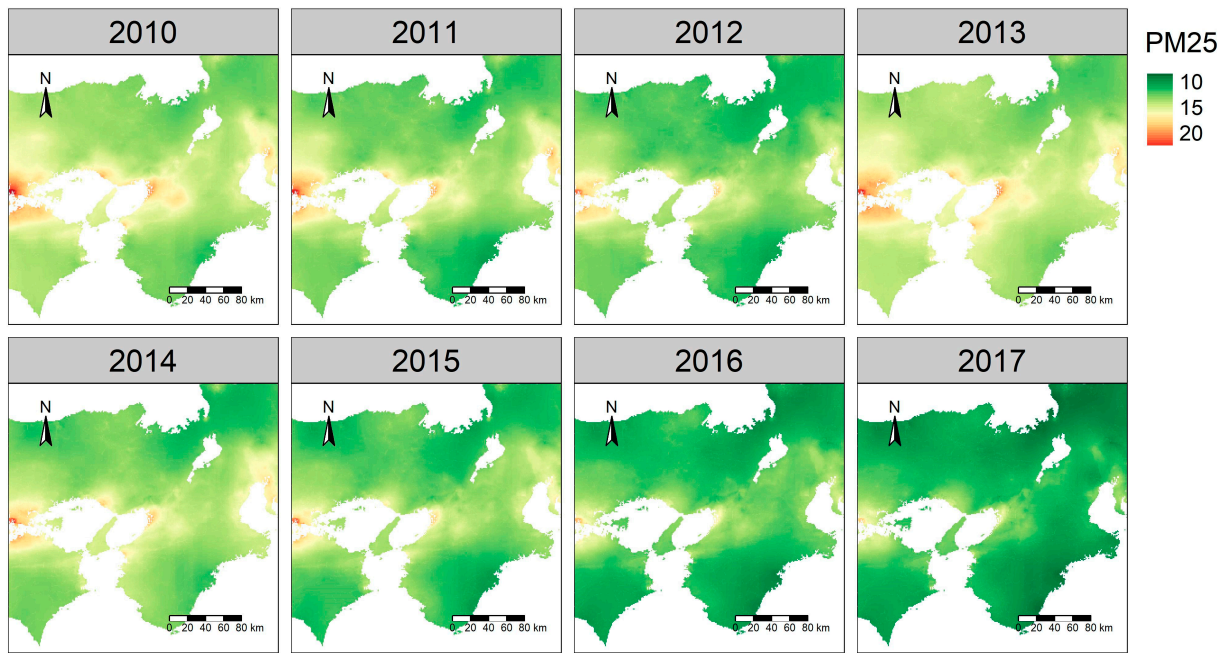

**Figure S8.** Annual prediction maps obtained by aggregating the daily predictions for the study period in each year.

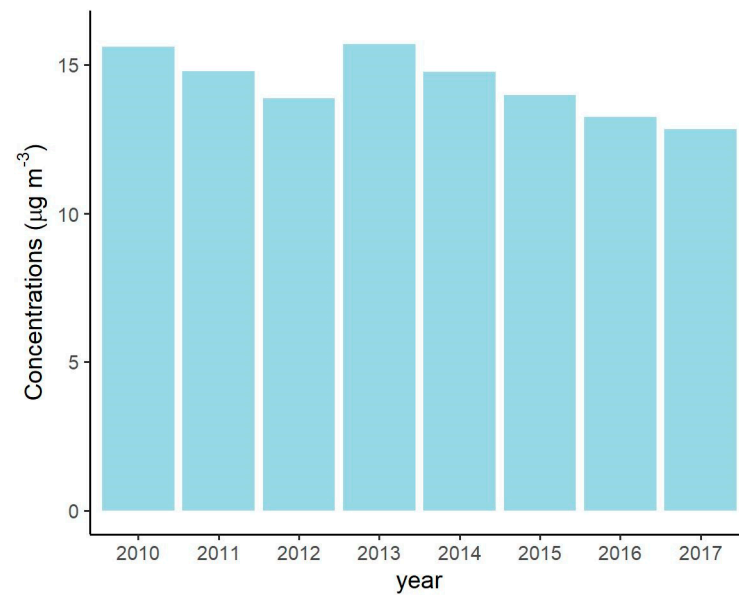

**Figure S9.** Temporal trend of PM<sub>2.5</sub> components in Amagasaki. The annual values were obtained by averaging the daily predictions for each year in Amagasaki.
