# Supplementary material for: Predicting Daily PM2.5 Exposure with Spatially Invariant Accuracy Using Co-Existing Pollutant Concentrations as Predictors
Source: MDPI journal article supplement (doi:10.3390/atmos13050782), 2022-05-12
Supplement: s1 [file s1]

Archive with 1 entries (1 files):
- atmosphere-1717332-supplementary.pdf
